# Supplementary material for: A two-photon endoplasmic reticulum-targeting fluorescent probe for the imaging of pH in living cells and zebrafish
Source: Royal Society of Chemistry journal article supplement (doi:10.1039/c8ay02199f), 2018-01-01
Supplement: c8ay02199f1.pdf [file c8ay02199f1.pdf]

*Supporting information for*

**A two-photon endoplasmic reticulum-targeting fluorescent  
probe for the imaging of pH in living cells and zebrafishes**

Nan Zhang, Baoli Dong, Xiuqi Kong, Chao Wang, Wenhui Song and Weiyong Lin\*

*Institute of Fluorescent Probes for Biological Imaging, School of Chemistry and Chemical  
Engineering, School of Materials Science and Engineering, University of Jinan, Jinan, Shandong  
250022, P.R. China.*

\*Corresponding Author.

Tel.: +86 53182769108.

*E-mail address:* weiyonglin2013@163.com.

## 1. Materials and instruments

All reagents were mentioned in this work of analytical grade.  $^1\text{H}$  NMR and  $^{13}\text{C}$  NMR spectra were collected on an AVANCE III 400 MHz Digital NMR Spectrometer. High resolution mass spectrometric (HRMS) analyses were measured using a Finnigan MAT 95 XP spectrometer. UV-Vis and Fluorescence spectra were acquired on a Shimadzu UV-2700 spectrometer and HITACHI F-4600 fluorescence spectrophotometer, respectively. Fluorescence imaging of living cells and cells was performed on a Nikon A1MP confocal microscopy.

## 2. Cytotoxicity experiments

Cytotoxicity of **Na-pH** was evaluated using the standard MTT assay. HeLa cells were seeded into the 96 well-plates with the density of around 7000 cells/well. After 24 h, various concentrations of **Na-pH** were added into the wells and the cells were further cultured for 24 h. Then, 10  $\mu\text{L}$  of 5 mg/mL MTT was mixed into cells and the cells were incubated for another 4 h. Subsequently, 100  $\mu\text{L}$  DMSO were used to resolve the formazan and the plate was shaken for 20 min, and finally the absorbance was determined by a Thermo Fisher Scientific microplate reader. Cell viability was expressed as the percentage of the control culture value.

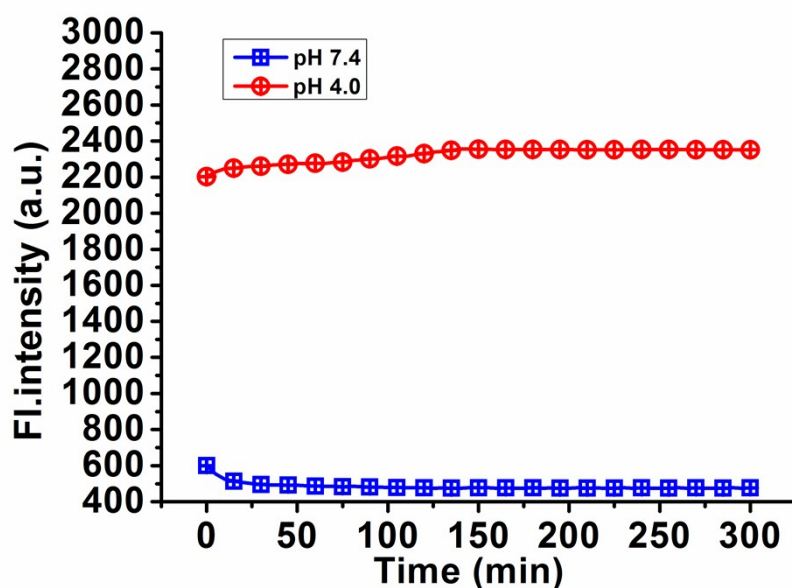

**Fig. S1.** Photostability of compound **Na-Ph** at different pH values (4.0 and 7.4, at 531nm) .

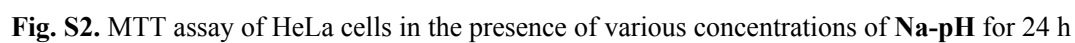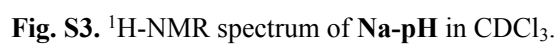



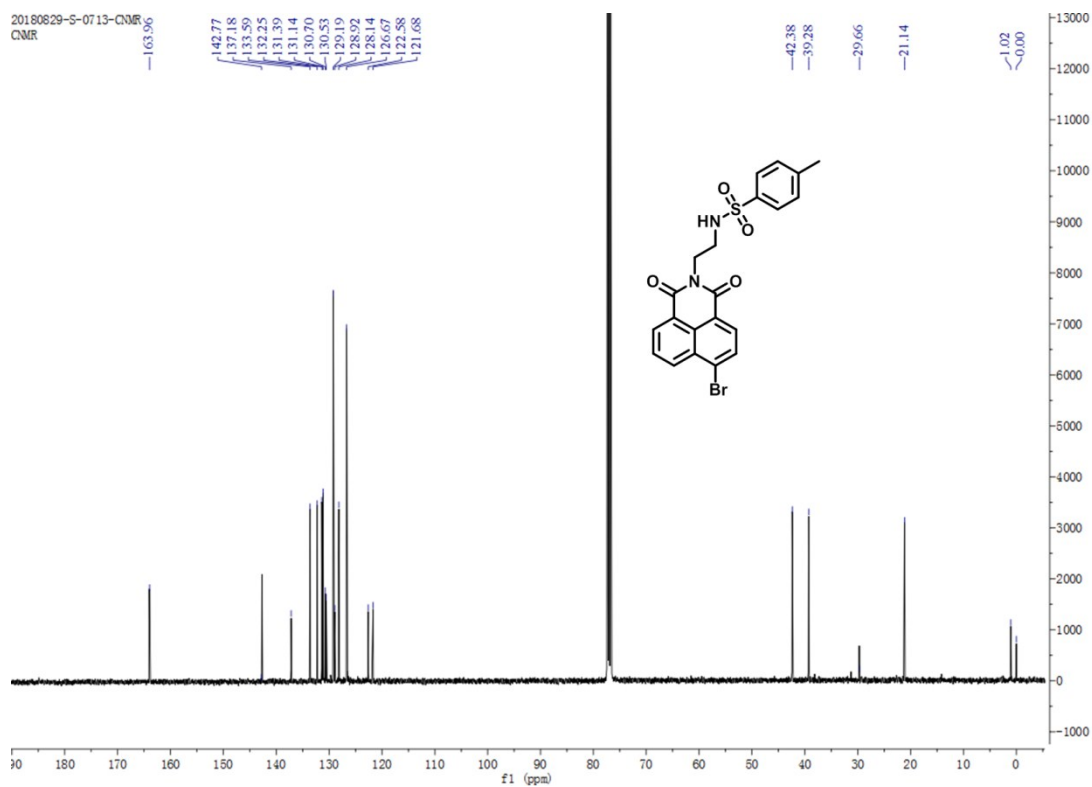

**Fig. S6.**  $^{13}\text{C}$ -NMR spectrum of Compound 1 in  $\text{CDCl}_3$ .

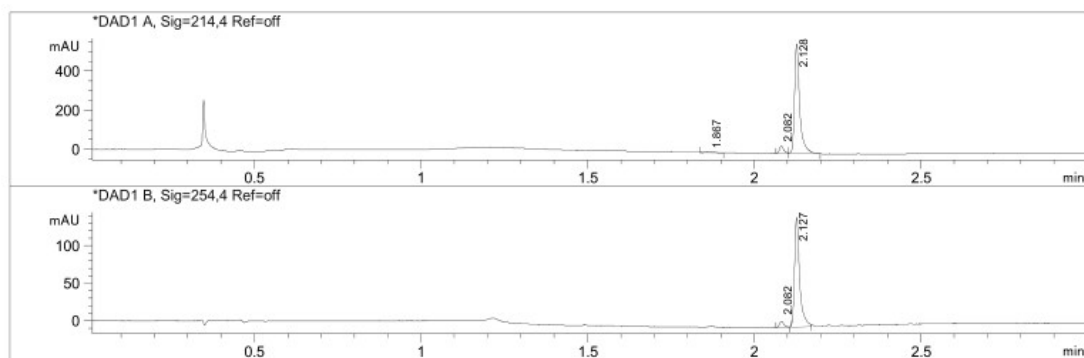

**Fig. S7.** LC-MS data of compound Na-pH

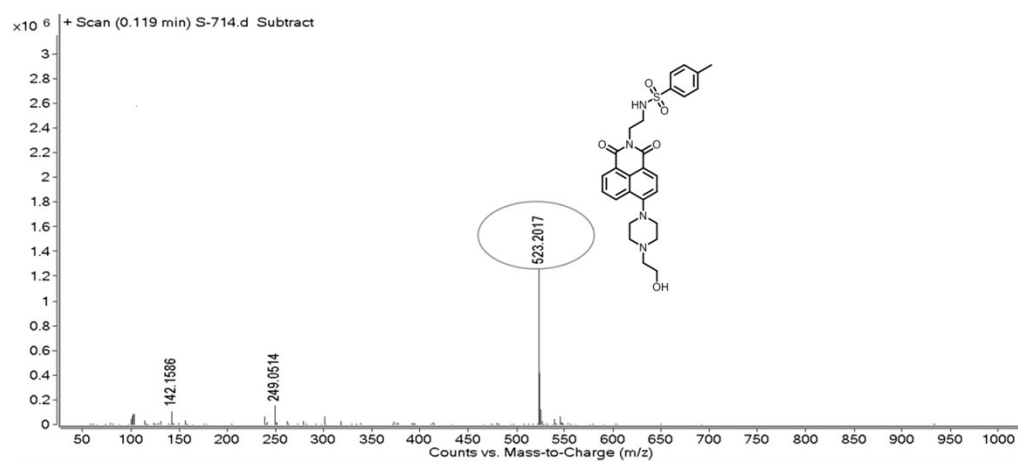

**Fig. S8.** HR-MS data of **1a-pH**
